# Supplementary material for: The Dfam community resource of transposable element families, sequence models, and genome annotations
Source: PubMed Central journal article supplement (PMC7805219; doi:10.1186/s13100-020-00230-y), 2021-01-12
Supplement: 13100_2020_230_MOESM4_ESM.pdf [file 13100_2020_230_MOESM4_ESM.pdf]

**Supplemental Table 2.** EBI dataset TE class and superfamily contribution and enrichment by clade for Supplemental Figure 2.

| class II TEs          |                   |                             |                |                       |                      |                      |
|-----------------------|-------------------|-----------------------------|----------------|-----------------------|----------------------|----------------------|
| Category              | Subclass          | RepeatMasker classification | All species #s | Fish                  | Birds                | Mammals              |
| DNA-polymerase        | Polinton/Maverick | DNA/Maverick                | 265            | 220                   | 6                    | 0                    |
| Helicase              | Helitron          | RC/Helitron                 | 3654           | 3056                  | 72                   | 3                    |
| Transposase           | Undefined         | DNA                         | 7379           | 6233                  | 373                  | 15                   |
| Transposase           | Academ            | DNA/Academ                  | 221            | 193                   | 0                    | 1                    |
| Transposase           | CACTA             | DNA/CMC                     | 3394           | 3157                  | 24                   | 34                   |
| Transposase           | Dada              | DNA/Dada                    | 77             | 76                    | 0                    | 0                    |
| Transposase           | Ginger            | DNA/Ginger                  | 68             | 40                    | 1                    | 0                    |
| Transposase           | hAT               | DNA/hAT                     | 50396          | 35965                 | 503                  | 2211                 |
| Transposase           | IS3EU             | DNA/IS3EU                   | 1388           | 1040                  | 89                   | 0                    |
| Transposase           | Kolobok           | DNA/Kolobok                 | 2965           | 2436                  | 32                   | 0                    |
| Transposase           | Merlin            | DNA/Merlin                  | 972            | 944                   | 15                   | 0                    |
| Transposase           | MULE              | DNA/MULE                    | 748            | 202                   | 9                    | 17                   |
| Transposase           | P element         | DNA/P                       | 1446           | 1444                  | 1                    | 0                    |
| Transposase           | PIF/Harbinger     | DNA/PIF                     | 13412          | 7868                  | 1029                 | 3                    |
| Transposase           | PiggyBac          | DNA/PiggyBac                | 1685           | 1534                  | 6                    | 39                   |
| Transposase           | Sola              | DNA/Sola                    | 584            | 565                   | 0                    | 1                    |
| Transposase           | Tc1-Mariner       | DNA/TcMar                   | 19808          | 15274                 | 181                  | 1450                 |
| Transposase           | Zator             | DNA/Zator                   | 133            | 117                   | 1                    | 0                    |
| Transposase           | Zisupton          | DNA/Zisupton                | 725            | 708                   | 5                    | 4                    |
| Y-recombinase         | Crypton           | DNA/Crypton                 | 1362           | 1310                  | 24                   | 1                    |
| <b>Total</b>          |                   |                             | <b>110682</b>  | <b>82382 (74.4%)</b>  | <b>2371 (2.1%)</b>   | <b>3779 (3.4%)</b>   |
| class I TEs           |                   |                             |                |                       |                      |                      |
| LINE                  | Undefined         | LINE                        | 218            | 147                   | 1                    | 23                   |
| LINE                  | L1                | LINE/L1                     | 10717          | 1740                  | 12                   | 7016                 |
| LINE                  | R2                | LINE/R2                     | 380            | 298                   | 21                   | 3                    |
| LINE                  | R4/Dong           | LINE/Dong                   | 683            | 382                   | 0                    | 17                   |
| LINE                  | Proto2            | LINE/Proto2                 | 100            | 100                   | 0                    | 0                    |
| LINE                  | CR1               | LINE/CR1                    | 13073          | 107                   | 8918                 | 169                  |
| LINE                  | L2                | LINE/L2                     | 13220          | 9725                  | 118                  | 980                  |
| LINE                  | Rex/Babar         | LINE/Rex                    | 6478           | 6065                  | 0                    | 0                    |
| LINE                  | I                 | LINE/I                      | 910            | 614                   | 16                   | 1                    |
| LINE                  | RTE/BovB          | LINE/RTE                    | 4608           | 2066                  | 102                  | 599                  |
| LINE-dependent        | Long              | Retroposon                  | 328            | 151                   | 2                    | 75                   |
| LINE-dependent        | Short (SINE)      | SINE                        | 471            | 455                   | 1                    | 0                    |
| LINE-dependent        | 5S-SINE           | SINE/5S                     | 423            | 140                   | 111                  | 29                   |
| LINE-dependent        | 7SL-SINE          | SINE/7SL                    | 569            | 11                    | 0                    | 545                  |
| LINE-dependent        | U-SINE            | SINE/U                      | 62             | 15                    | 0                    | 12                   |
| LINE-dependent        | tRNA-SINE         | SINE/tRNA                   | 5579           | 1971                  | 514                  | 1647                 |
| LTR                   | Undefined         | LTR                         | 1260           | 490                   | 37                   | 77                   |
| LTR                   | Bel-Pao           | LTR/Pao                     | 526            | 407                   | 13                   | 1                    |
| LTR                   | Ty1/Copia         | LTR/Copia                   | 1273           | 402                   | 19                   | 4                    |
| LTR                   | Ty3/Gypsy         | LTR/Gypsy                   | 10380          | 4567                  | 87                   | 36                   |
| LTR                   | Caulimoviruses    | LTR/Caulimovirus            | 46             | 9                     | 1                    | 2                    |
| LTR                   | ERV-like          | LTR/ERV                     | 338            | 49                    | 246                  | 33                   |
| LTR                   | ERV1              | LTR/ERV1                    | 7671           | 1815                  | 1435                 | 3154                 |
| LTR                   | ERV2              | LTR/ERV2                    | 2974           | 30                    | 1445                 | 1425                 |
| LTR                   | ERV3              | LTR/ERV3                    | 8088           | 11                    | 4407                 | 3582                 |
| LTR                   | ERV4              | LTR/ERV4                    | 348            | 0                     | 0                    | 0                    |
| Penelope              | Penelope          | Penelope                    | 3536           | 1213                  | 161                  | 2                    |
| DIRS-like             | DIRS              | LTR/DIRS                    | 2473           | 1353                  | 1                    | 1                    |
| DIRS-like             | Ngaro             | LTR/Ngaro                   | 1452           | 1210                  | 3                    | 2                    |
| <b>Total</b>          |                   |                             | <b>98184</b>   | <b>35534 (36.2%)</b>  | <b>17770 (19.9%)</b> | <b>19433 (19.8%)</b> |
| structural RNA copies | rRNA              | rRNA                        | 194            | 145                   | 20                   | 0                    |
| structural RNA copies | scRNA             | scRNA                       | 7              | 0                     | 0                    | 7                    |
| structural RNA copies | snRNA             | snRNA                       | 174            | 41                    | 0                    | 104                  |
| structural RNA copies | tRNA              | tRNA                        | 597            | 516                   | 4                    | 10                   |
|                       | Satellite         | Satellite                   | 1054           | 540                   | 275                  | 64                   |
|                       | Unknown           | Unknown                     | 55421          | 36272                 | 4555                 | 1184                 |
|                       | Other             | Other                       | 427            | 448                   | 112                  | 66                   |
| <b>Total</b>          |                   |                             | <b>266740</b>  | <b>155887 (58.4%)</b> | <b>25108 (9.4%)</b>  | <b>24649 (9.3%)</b>  |
